# Supplementary material for: Soft hybrids of Eu3+ beta-diketonates and MS (M = Zn, Cd) nanoparticles using mercapto-ionic liquid linkage for white luminescence integration
Source: Royal Society of Chemistry journal article supplement (doi:10.1039/c3nj00547j), 2013-01-01
Supplement: c3nj00547j.pdf [file c3nj00547j.pdf]

## Electronic Supporting Information

### Experimental section

**Chemicals:** Chemicals were purchased from commercial sources. All solvents were analytical grade and without further purification.  $\text{Eu}(\text{NO}_3)_3 \cdot x\text{H}_2\text{O}$  was prepared by dissolving its oxide  $\text{Eu}_2\text{O}_3$  in concentrated nitric acid ( $\text{HNO}_3$ ).

**Physical characterization:** X-ray diffraction patterns (SAXRD) were recorded on a Rigaku D/max-Rb diffractometer equipped with a Cu anode in a  $2\theta$  range from 10 to 70 °. Fourier transform infrared spectra (FTIR) were measured within KBr slices from 4000–400  $\text{cm}^{-1}$  using a Nexus 912 AO446 infrared spectrum radiometer. Luminescence excitation and emission spectra of the solid samples were obtained on Edinburgh FLS920 spectrophotometer. The outer luminescent quantum efficiency was determined using an integrating sphere (150 mm diameter,  $\text{BaSO}_4$  coating) from Edinburgh FLS920 phosphorimeter. The quantum yield can be defined as the integrated intensity of the luminescence signal divided by the integrated intensity of the absorption signal. The absorption intensity was calculated by subtracting the integrated intensity of the light source with the sample in the integrating sphere from the integrated intensity of the light source with a blank sample in the integrating sphere.

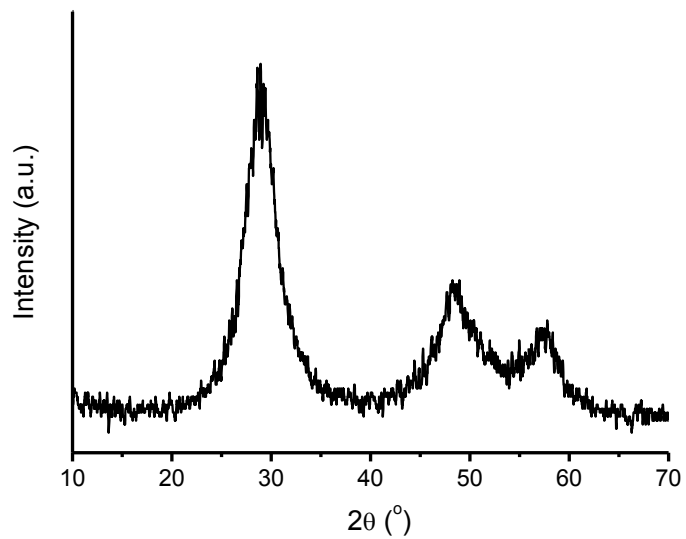

a

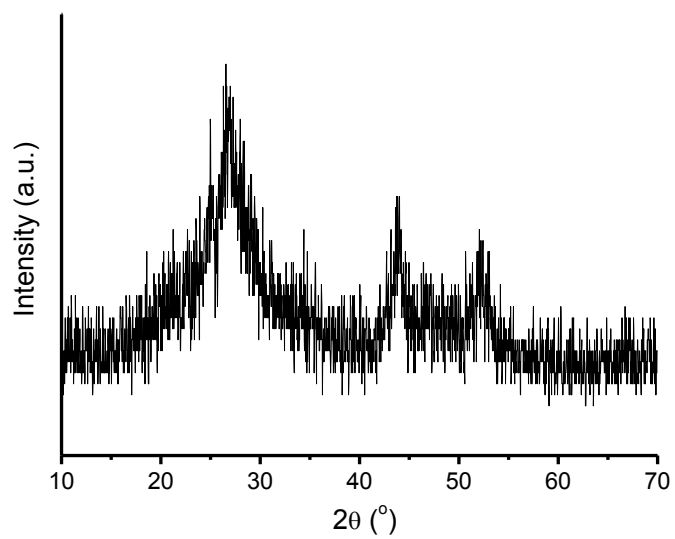

b

**Figure S1** The XRD pattern of ZnS (a) and CdS (b) nanoparticles

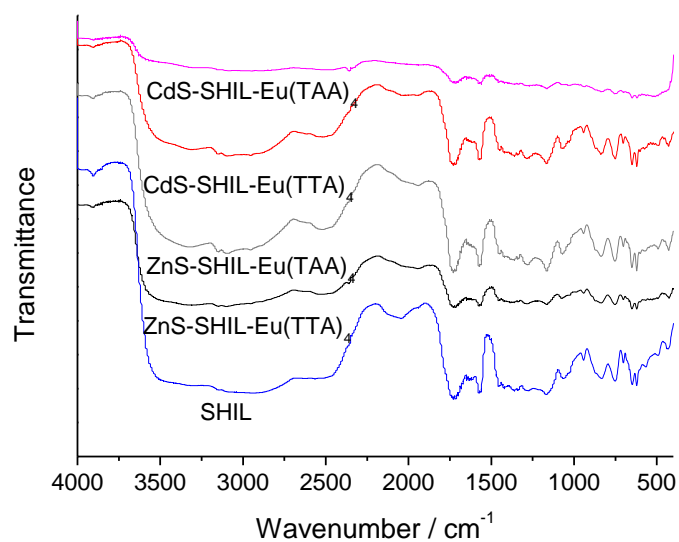

**Figure S2** FTIR spectra for the ionic liquid SHIL and the hybrid soft materials MS-SHIL-Eu(L)<sub>4</sub> (M = Zn, Cd; L = TTA, TAA)

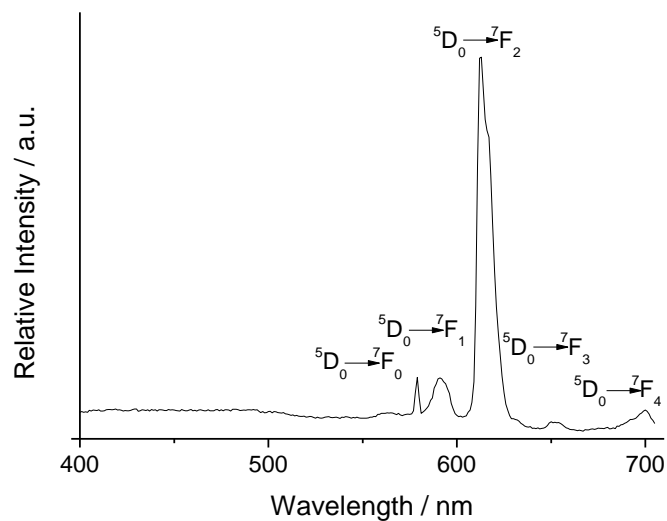

**Figure S3** Selected luminescent spectrum of solution of  $\text{Eu}(\text{TTA})_4$  in ionic liquid

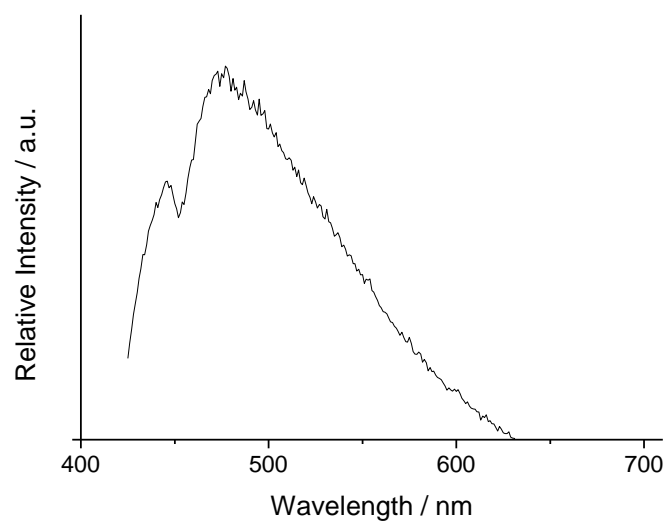

**Figure S4** Selected luminescent spectrum of suspension of quantum dots (CdS) in ionic liquid
